# Supplementary material
Source: MDPI journal article supplement (https://www.mdpi.com/2504-3129/5/1/9)
Supplement: s1 [file s1]

Archive with 3 entries (3 files):
- Supplemental Figure S1.pdf
- Supplemental Figure S2.pdf
- Supplemental Table S1.pdf
